# Supplementary material
Source: Springer Nature journal article supplement (https://www.springermedizin.de/resource/supplementary/12885_2011_2767_MOESM9_ESM.pdf/9461894)

**Normalized and Temp-Shifted Difference Plot**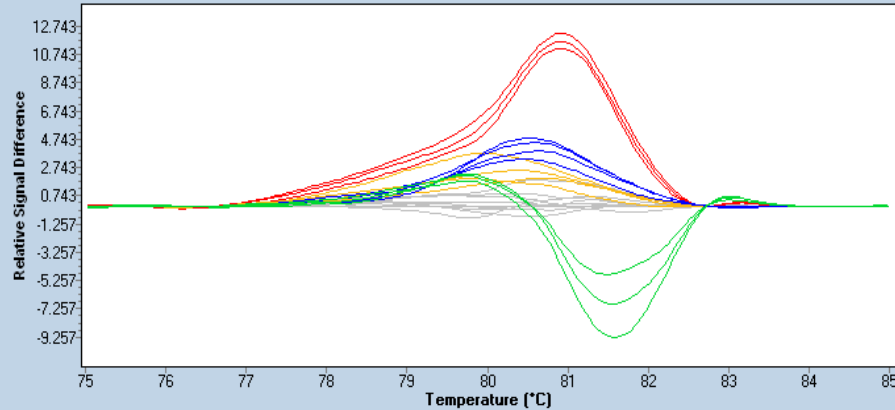**Melting Peaks**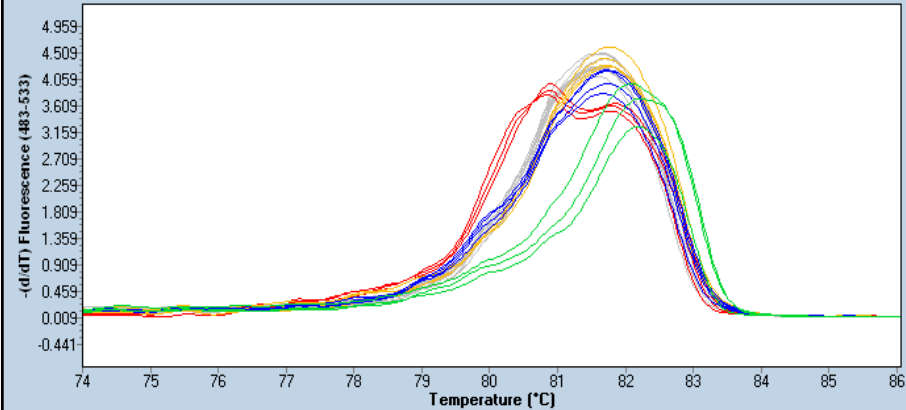**Normalized and Temp-Shifted Difference Plot**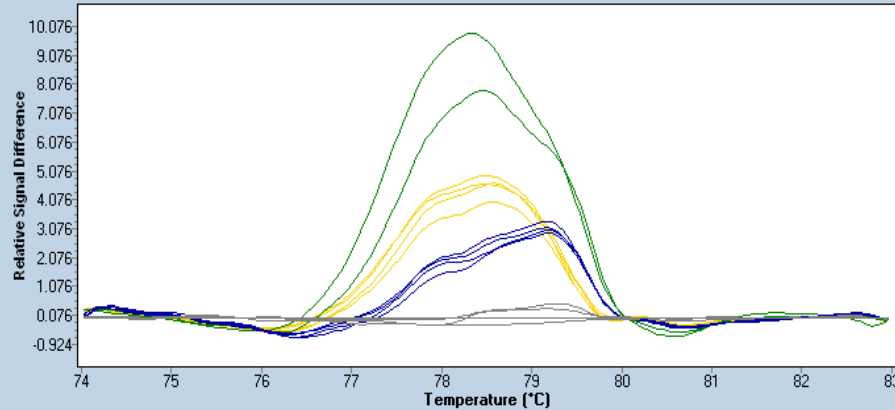**Melting Peaks**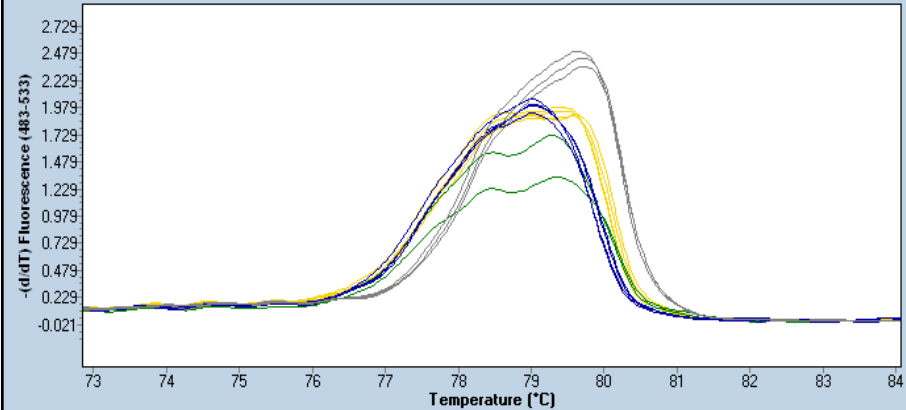

Supplement: MOESM9 [file 9461894]
